# Supplementary material for: Microtubule self-organisation during seed germination in Arabidopsis
Source: PubMed Central journal article supplement (PMC7191766; doi:10.1186/s12915-020-00774-8), 2020-04-30
Supplement: 12915_2020_774_MOESM6_ESM.pdf [file 12915_2020_774_MOESM6_ESM.pdf]

**Table S2. Primer sequences used for qRT-PCR.**

| Gene ID   | Gene name                            | Forward primer (5'-3')    | Reverse primer (5'-3')   |
|-----------|--------------------------------------|---------------------------|--------------------------|
| At4g14960 | <i>TUA6</i>                          | AACATGGCATTTCAGCCTGAT     | CGTCGATCACAGTTGGCTC      |
| At5g62700 | <i>TUB3</i>                          | CCCAGCTTTGGTGATTTGAAC     | GCTTACGGAGGTCAGAGTTGA    |
| At5g44340 | <i>TUB4</i>                          | TCCTACCTTTGGTGATCTTAACCAT | CAACCATGAAGAAGTGAAGCCTTG |
| At1g20010 | <i>TUB5</i>                          | CCTAGCTTTGGAGACTTGAACC    | CCACCATGAAGAAATGGAGACGAG |
| At5g12250 | <i>TUB6</i>                          | ACTCCTAGCTTTGGTGATCTGAAT  | TGGAGACGAGGGAAAGGAATG    |
| AT3G61650 | <i>TUBG1</i>                         | AAGCTGATGGAAGTGACAGT      | ATAAGATCCCATACCTGAGCCA   |
| At5g55230 | <i>MAP65-1</i>                       | CCAGAAAGAGAAGAGTGACAGG    | GTGACGGTGCTTAAGAAATCCAA  |
| At4g26760 | <i>MAP65-2</i>                       | TCCAGAAAGAGAAGAGTGATAGGT  | TCTAAGCTCGGATGAACTTCGG   |
| At3g47690 | <i>EB1a</i>                          | TCCGATAGTGGTAGCAGTGAAG    | TTCCAGTTGTTCTCCGTTTCCT   |
| At2g20190 | <i>CLASP</i>                         | CTCTTGTTCCCTGCTGTTGTCG    | ATGAAACCTCCATGAGAGTCGT   |
| At1g80350 | <i>KTN1</i>                          | CTGAGTCTATGAATGGTGATGC    | CATCCCAACGGACACCAG       |
| AT2g35630 | <i>MORI</i>                          | GATTCTTGGTGCTGACATCTGG    | CGCCTTAATGCTGCTCGT       |
| At5g53560 | <i>Cytochrome B5 isoform E</i>       | TGAAGAAGTTTCAAAGCACAACA   | TCATCCATGAATGGAGTCACA    |
| At4g26410 | <i>Chromosome-associated kinesin</i> | GAGCTGAAGTGGCTTCCATGAC    | GGTCCGACATACCCATGATCC    |
| At4g34270 | <i>TIP41-like family protein</i>     | GTGAAAACCTGTTGGAGAGAAGCAA | TCAACTGGATACCCTTTCGCA    |
